# Supplementary material for: Substantial deletion overlap among divergent Arabidopsis genomes revealed by intersection of short reads and tiling arrays
Source: PubMed Central journal article supplement (PMC2847716; doi:10.1186/gb-2010-11-1-r4), 2010-01-12
Supplement: gb-2010-11-1-r4-S1.pdf [file gb-2010-11-1-r4-S1.pdf]

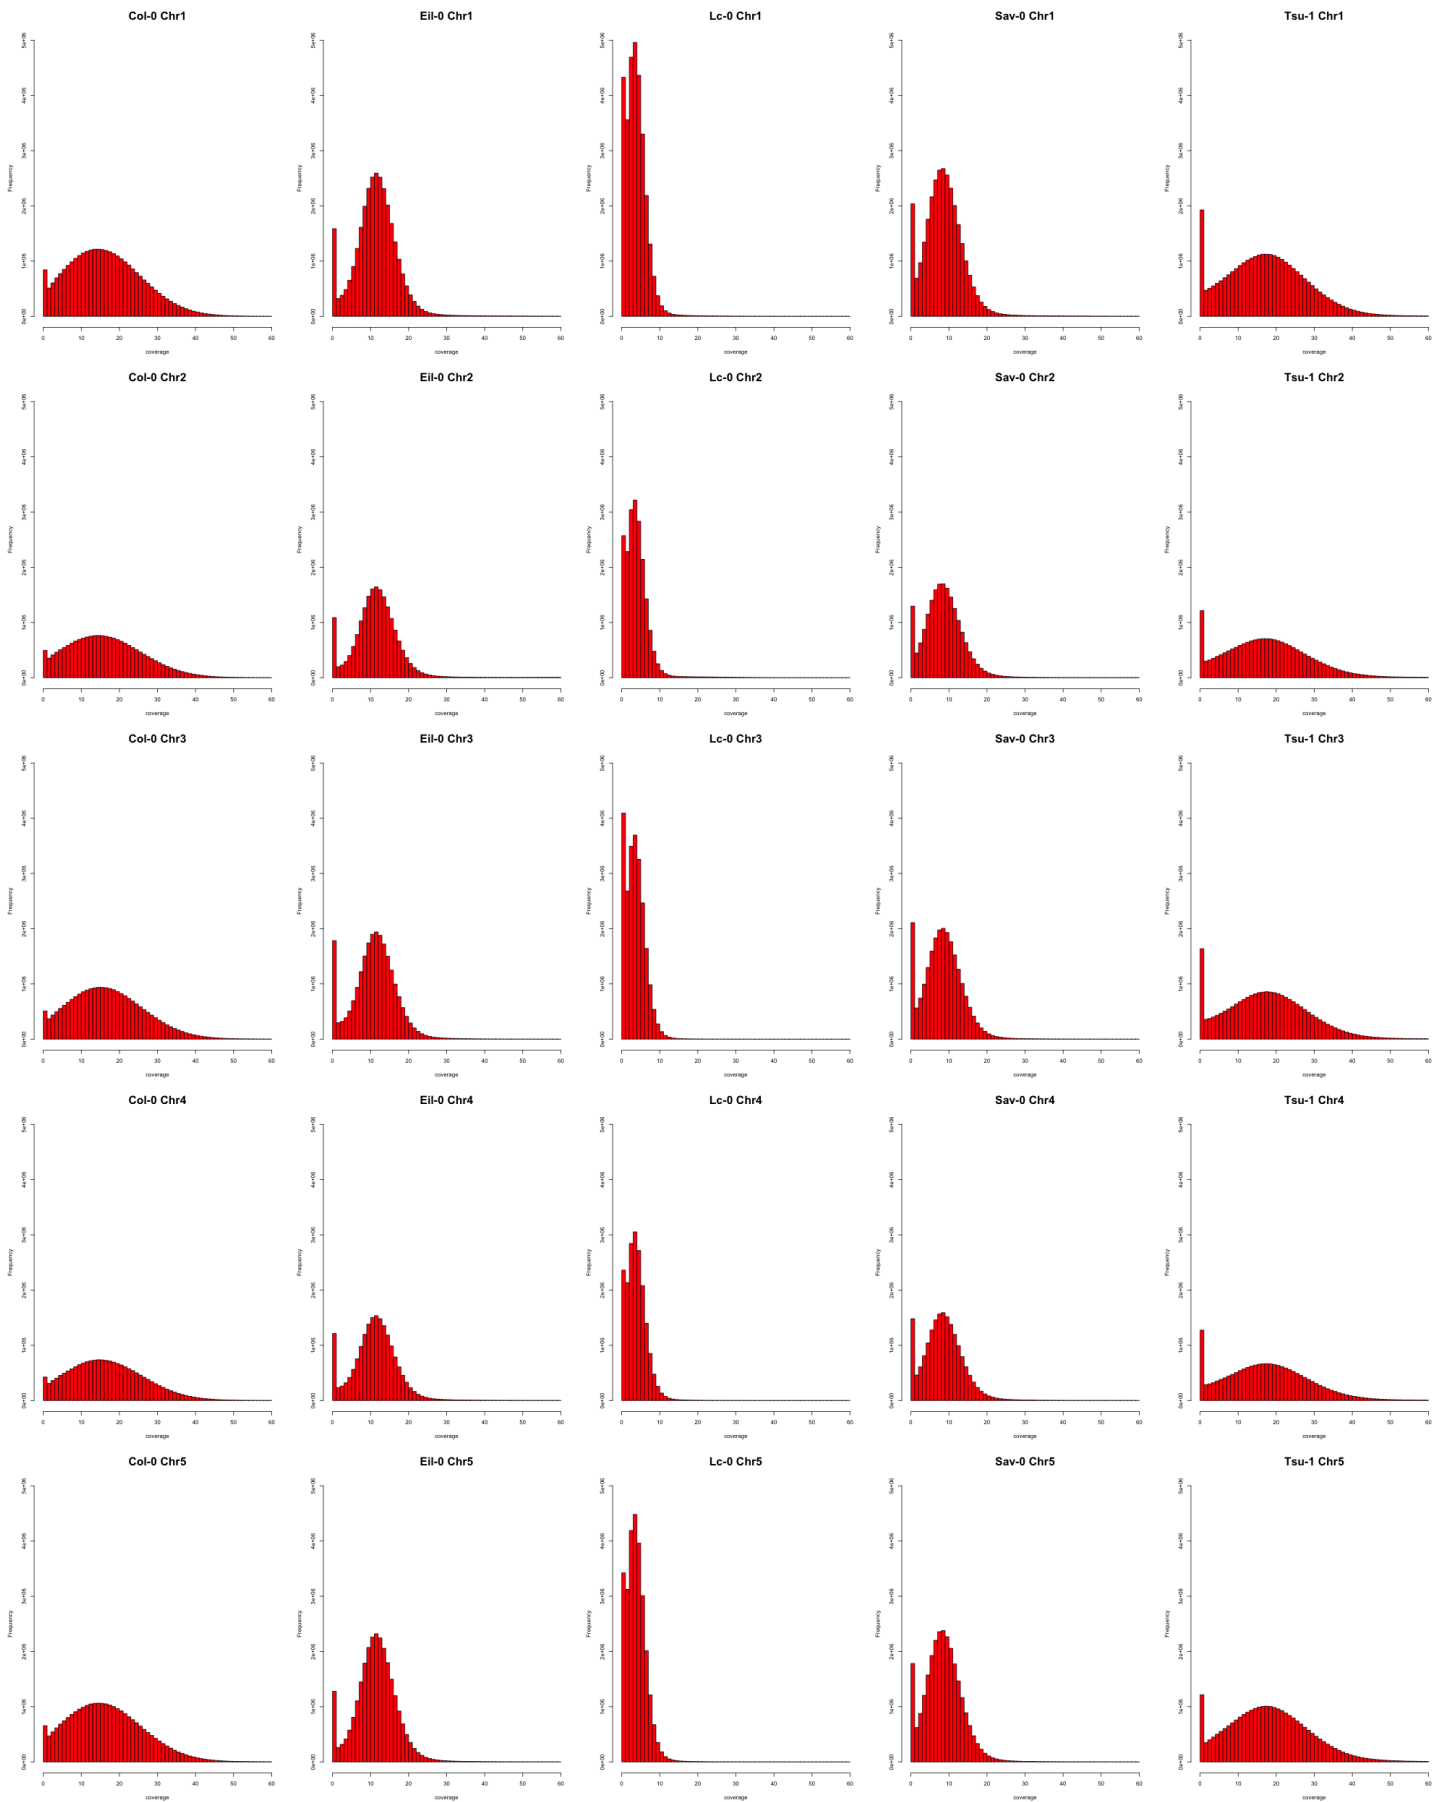

**Supplemental Figure 1** Distribution of the read coverage for the five Arabidopsis chromosomes across the different accessions. y axis: frequency; x axis: coverage;
