# Supplementary material for: Substantial deletion overlap among divergent Arabidopsis genomes revealed by intersection of short reads and tiling arrays
Source: PubMed Central journal article supplement (PMC2847716; doi:10.1186/gb-2010-11-1-r4), 2010-01-12
Supplement: gb-2010-11-1-r4-S3.pdf [file gb-2010-11-1-r4-S3.pdf]

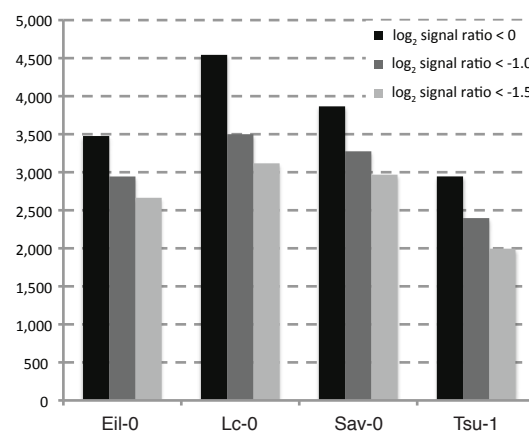

**Supplemental Figure 2** Number of unique tiles from the Col-0 genome without UHTS coverage in the four accessions that have a tiling array signal ratio < 0, < -1.0, or < -1.5. Only tiles located within transcript regions were considered.
